# Critical Care & Trauma: Lung Injury & Sepsis

**A-510 Room 310, 10/18/2000 2:00 PM - 3:30 PM (PD)**  
**Density Area in Dependent Lung Regions during Prone Position and PEEP Estimated with Transesophageal Echography** *Toshibito Tsubo, MD; Ichiro Sakai, MD; Hirobumi Okawa, MD; Hironori Ishihara, MD; Akitomo Matsuki, MD, ICU, University of Hirosaki, Hirosaki, Aomori-ken, Japan.* Transesophageal echography is useful to observe density area in dependent lung regions during prone position and PEEP.

**A-511 Room 310, 10/18/2000 2:00 PM - 3:30 PM (PD)**  
**Regional Differences in Lung Recruitment with PEEP in Experimental Acute Lung Injury Determined with CT** *Brett A. Simon, MD, PhD; John M. Downie, MD; Catherine Marcucci, MD; Matt G. Piper, BA, Anesthesiology and Critical Care Medicine, Johns Hopkins Medical Institutions, Baltimore, MD, United States.* Differences in lung recruitment patterns between apex and base were evident from CT analysis.

**A-512 Room 310, 10/18/2000 2:00 PM - 3:30 PM (PD)**  
**Effects of Zero Balanced Continuous Venovenous Hemofiltration (CVVH) on Oxygenation in an Animal Model of ARDS** *Rapbael C. Salerno, MD; Jean L. Vaille, MD; Jean M. Constantin, MD; Pierre Schoeffler, MD; Jean E. Bazin, MD, PhD, Department of Anesthesia, CHRU, Clermont-Ferrand, France.* Zero balanced continuous venovenous hemofiltration improved oxygenation (PaO<sub>2</sub>/FiO<sub>2</sub>) in an oleic acid model of ARDS in pigs.

**A-513 Room 310, 10/18/2000 2:00 PM - 3:30 PM (PD)**  
**Differential Gene Expression in Acute Lung Injury** *David C. Coy, MD, Anesthesiology, University of North Carolina, Chapel Hill, NC, United States.* A gene expression array defined patterns of expression induced by TNF $\alpha$  and IL-1b in A549 cells. Both cytokines induced significant changes in expression, but IL-1b induced many more genes than TNF $\alpha$ .

**A-514 Room 310, 10/18/2000 2:00 PM - 3:30 PM (PD)**  
**Oxygen in Culture Influences Phenotype of Stem Cells: The Choice between Skeletal Muscle and Fat** *Marie E. Csete, MD, PhD; Jean Walikonis, BA; Sheryl Korsnes, MS; Barbara J. Wold, PhD, Anesthesiology, University of Michigan, Ann Arbor, MI, United States.* Satellite stem cells are the source of skeletal muscle regeneration. We show that 6% O<sub>2</sub> (vs. 20% O<sub>2</sub>) dramatically enhances muscle regeneration in vitro.

**A-515 Room 310, 10/18/2000 2:00 PM - 3:30 PM (PD)**  
**Cognitive Dysfunction with Septic Encephalopathy: An Evaluation Using the Hole-Board-Test** *Barbara Mayer, MD; Frauke Ohl, MD; Christian Werner, MD, PhD; Ralph Bogdanski, MD; Manfred Blobner, MD, PhD, Anesthesiology, Klinikum rechts der Isar, Munich, Germany.* In rats subjected to systemic inflammation cognitive dysfunction can be detected using the hole board test.

**A-516 Room 310, 10/18/2000 2:00 PM - 3:30 PM (PD)**  
**The Effect of the Norepinephrine Dosage/Serum Cortisol Ratio during Septic Shock on Post-Traumatic Stress Disorder in Survivors** *Gustav Schelling, MD; Josef Briegel, MD; Christian Stoll, MD; Hans-Bernd Rothenbaeuser, MD; Hans-Peter Kapfhammer, MD, Anesthesiology, Ludwig-Maximilians University, Munich, Germany.* Norepinephrine and cortisol during septic shock were strong predictors for PTSD.

**A-517 Room 310, 10/18/2000 2:00 PM - 3:30 PM (PD)**  
**Alpha-2-Agonists (A2As) Increases Anesthetic Mortality in a Rat Model of Endotoxemia** *Aisling Conran, M.D.; Paul Wischmeyer, M.D.; Rachel Wolfson, M.D.; Mark Musch, PhD; Madelyn Kabana, M.D., Anesthesia and Critical Care, University of Chicago, Chicago, IL, United States.* In a rat model of volume resuscitated endotoxemia, A2As significantly increased mortality over isoflurane controls.
